# Supplementary material for: Characteristics and outcomes of patients with suspected heart failure referred in line with National Institute for Health and Care Excellence guidance
Source: PubMed Central journal article supplement — Heart. 2020 Jul 20;106(20):1579–85. doi: 10.1136/heartjnl-2019-316511 (PMC7525790; doi:10.1136/heartjnl-2019-316511), 2020-07-20
Supplement: heartjnl-2019-316511supp001.pdf [file heartjnl-2019-316511supp001.pdf]

## Online Supplement

| Age Cohort (years) | Number of patients | Median NTproBNP (pg/mL) | (Interquartile Range) | 90% cut-off NTproBNP (pg/mL) |
|--------------------|--------------------|-------------------------|-----------------------|------------------------------|
| <65                | 53                 | 2913                    | (1192-4689)           | 707                          |
| 65-69              | 50                 | 2694                    | (1200-5298)           | 757                          |
| 70-74              | 88                 | 2299                    | (1006-4642)           | 584                          |
| 75-79              | 117                | 2335                    | (1161-3858)           | 693                          |
| 80-84              | 167                | 2708                    | (1137-5093)           | 718                          |
| 85-89              | 155                | 3093                    | (1892-5232)           | 829                          |
| >90                | 68                 | 3886                    | (2167-6927)           | 952                          |

Online Table 1. NTproBNP levels at which 90% of patients with heart failure were detected in

5-year age ranges.

|                           | All NHF Patients (n=566) | Portsmouth (n=459) | Southampton (n=107) | p Value |
|---------------------------|--------------------------|--------------------|---------------------|---------|
| Atrial Fibrillation       | 107 (19%)                | 76 (17%)           | 31 (29%)            | 0.003   |
| Respiratory disease       | 101 (18%)                | 82 (18%)           | 19 (18%)            | 0.979   |
| Hypertension              | 52 (9%)                  | 39 (8%)            | 13 (12%)            | 0.239   |
| Valvular heart disease    | 42 (7%)                  | 30 (7%)            | 12 (11%)            | 0.096   |
| Ischaemic heart disease   | 20 (4%)                  | 17 (4%)            | 3 (3%)              | 0.649   |
| Other                     | 161 (28%)                | 139 (30%)          | 22 (20%)            | 0.059   |
| No clear single diagnosis | 83 (15%)                 | 76 (16%)           | 7 (7%)              | 0.008   |

Online Table 2. Final diagnosis in the Not Heart Failure (NHF) patients.

p values refer to comparisons between the two study sites.
